# Supplementary material for: Genetic mapping of AhVt1, a novel genetic locus that confers the variegated testa color in cultivated peanut (Arachis hypogaea L.) and its utilization for marker-assisted selection
Source: Front Plant Sci. 2023 Mar 20;14:1145098. doi: 10.3389/fpls.2023.1145098 (PMC10067746; doi:10.3389/fpls.2023.1145098)
Supplement: Supplementary file 1 [file Table_1.xlsx]

## Sheet: Sheet1
Tab. S1 Primers used in this study
Marker	Forward primer	Reverse primer
PA01
PA2
PA4
PA5
PA6
PA7
PA8
PA10
PB7
PC4
PC6
PF1
PF2
PF3
