# Supplementary material for: Genetic mapping of AhVt1, a novel genetic locus that confers the variegated testa color in cultivated peanut (Arachis hypogaea L.) and its utilization for marker-assisted selection
Source: Front Plant Sci. 2023 Mar 20;14:1145098. doi: 10.3389/fpls.2023.1145098 (PMC10067746; doi:10.3389/fpls.2023.1145098)
Supplement: Supplementary file 2 [file Table_2.xlsx]

## Sheet: Sheet1
Tab. S2 Distribution of SNPs and Indels between FH8 and Wc
Chr	Length(bp)	SNPs		Indels
		Count	Density(Mb-1)	Count	Density(Mb-1)
A01	112420854	35261	313.65	3163	28.14
A02	103302290	10291	99.62	1280	12.39
A03	143109472	13220	92.38	1408	9.84
A04	128801742	19012	147.61	2111	16.39
A05	116542366	13979	119.95	1569	13.46
A06	118975115	16830	141.46	2040	17.15
A07	81752458	10465	128.01	1368	16.73
A08	51529986	5001	97.05	939	18.22
A09	120499698	16207	134.5	1532	12.71
A10	117076737	13819	118.03	1500	12.81
B01	149287806	22289	149.3	2665	17.85
B02	120530088	4066	33.73	546	4.53
B03	146301462	15904	108.71	2085	14.25
B04	143237272	21432	149.63	2381	16.62
B05	160028458	16117	100.71	2041	12.75
B06	151242074	19861	131.32	2604	17.22
B07	134191082	19848	147.91	2117	15.78
B08	135027066	20321	150.5	2158	15.98
B09	159361216	13739	86.21	2078	13.04
B10	145034356	14715	101.46	1750	12.07
Whole	2538251598	322377	127.008	37335	14.7089
"Chr" represents the number of chromosome,"length" indicates the length of chromosome
