# Supplementary material for: Genetic mapping of AhVt1, a novel genetic locus that confers the variegated testa color in cultivated peanut (Arachis hypogaea L.) and its utilization for marker-assisted selection
Source: Front Plant Sci. 2023 Mar 20;14:1145098. doi: 10.3389/fpls.2023.1145098 (PMC10067746; doi:10.3389/fpls.2023.1145098)
Supplement: Supplementary file 3 [file Table_3.xlsx]

## Sheet: Sheet1
Tab. S3 Annotation of predicted genes in AhVt1 mapping region
Gene ID	Gene Annotation
arahy.SFNX64	FAR-RED impaired response-like protein
arahy.K57DW9	ACT domain repeat 3
arahy.Y173KB	vitellogenin-2-like
arahy.D0Q561	ENTH/VHS/GAT family protein
arahy.33MSFM	senescence-inducible chloroplast stay-green protein 2
arahy.7Z40J1	probable methyltransferase PMT26-like
arahy.IZP4D2	Protein kinase family protein
arahy.YPS6G7	Protein kinase family protein
arahy.QU8W8M	protein serine/threonine kinases; protein kinases
arahy.ECT8PE	Unknown protein
arahy.J11VHB	Protein kinase family protein
arahy.H7N144	protein serine/threonine kinases
arahy.TS21P9	gibberellin 20 oxidase 2-like
arahy.GX31L7	uncharacterized serine-rich protein C215.13-like
arahy.W96YQ7	Unknown protein
arahy.H1H5BB	chalcone synthase-like
arahy.LY4YXE	chalcone synthase-like
arahy.FM6CZ7	chalcone synthase-like
arahy.37ZNH1	Calcium-binding EF-hand family protein
arahy.TVXF2I	UDP-sugar pyrophosphorylase
arahy.G5JU44	NAD(P)H-quinone oxidoreductase subunit M
arahy.6HV4D5	zinc finger CCCH domain protein
arahy.Q6N5X0	Protein kinase superfamily protein
arahy.XM429X	Glutathione S-transferase family protein
arahy.YW25AB	uncharacterized protein LOC102668337
arahy.Z22D2G	histone-lysine N-methyltransferase SUVR2-like isoform X2
arahy.A110NB	putative nuclease HARBI1-like
arahy.NKL1UU	MADS-box transcription factor family protein
arahy.8X384Y	plastid transcriptionally active 6
arahy.PT3H3P	uncharacterized protein LOC100799794 isoform X1
arahy.MS2M1P	NAD kinase 2
arahy.1X31DU	1-aminocyclopropane-1-carboxylate oxidase 5-like
arahy.V5YSST	Preprotein translocase SecA family protein
arahy.FIZF7Q	WD repeat-containing protein 48-like isoform X4
arahy.0GY0RD	unknown protein
arahy.W1K5LL	auxilin-related protein 1-like isoform X1
arahy.AG2MXP	transmembrane amino acid transporter family protein
arahy.YE1T8K	signal peptidase I family protein
arahy.IKMM6A	tolB protein-related
arahy.Z56QHF	Cyclin A1
arahy.R82D2M	replication factor C subunit 3
arahy.34D5TH	uncharacterized protein LOC102661655
arahy.KT6FMN	NRAMP metal ion transporter 6
arahy.D2JSQE	SWI/SNF complex subunit SWI3C-like
arahy.F6N15A	beta-galactosidase 16
arahy.0IJH0T	immediate early response 3-interacting protein 1-like isoform X2
arahy.NR0JCZ	Flavin-containing monooxygenase family protein
arahy.KGK0UB	BTB/POZ domain-containing protein
arahy.GV74HV	Acyl-CoA N-acyltransferases (NAT) superfamily protein
arahy.W8H4W4	F-box protein 7
arahy.FEC6C4	uncharacterized protein LOC102669844
arahy.A3CFJS	IAA-amino acid hydrolase ILR1-like protein
arahy.YMC104	delta-aminolevulinic acid dehydratase
arahy.3CT7Q0	Unknown protein
arahy.YMMA3V	serine/threonine-protein phosphatase 7 long form homolog
arahy.FQ5ZUR	response regulator 9
arahy.HABD5Z	geranyl diphosphate synthase 1
arahy.KB1BCJ	protein disulfide isomerase-related
arahy.7GBM4B	uncharacterized protein LOC100787627
arahy.94S7W0	ascorbate peroxidase 3
arahy.MUP6ZF	zinc finger MYM-type protein 1-like
arahy.VG02DH	zinc finger MYM-type protein 1-like
arahy.Z6ZXKG	aldehyde dehydrogenase family 3 member H1-like
arahy.QY9W84	DNAJ homologue 2
arahy.K09IY9	Unknown protein
arahy.8M56MU	zinc finger MYM-type protein 1-like
arahy.SCN40X	Eukaryotic aspartyl protease family protein
arahy.0P0L33	replication factor C subunit 3
arahy.BFU0GS	NAC domain protein
arahy.N7WRT5	filament-like plant protein-like isoform X3
arahy.29UIE3	TLC domain-containing protein 2-like
arahy.L9FPHH	photosystem II 22 kDa protein, chloroplastic-like
arahy.CFE04G	F8K7.25 protein
arahy.I1811Q	long chain acyl-CoA synthetase 9
arahy.NY6I93	probable sugar phosphate/phosphate translocator
arahy.QHVB9K	Adenine nucleotide alpha hydrolases-like superfamily protein
arahy.1LZC07	uncharacterized protein LOC100815984 isoform X2
arahy.LQ7JZT	lysm domain GPI-anchored protein 1 precursor
arahy.MKV7IN	general transcription factor IIH subunit, putative
arahy.T53UMC	unknown protein
arahy.9F81FQ	nodulin MtN21 /EamA-like transporter family protein
arahy.M7858J	nodulin MtN21 /EamA-like transporter family protein
arahy.VD5UEC	ribulose bisphosphate carboxylase large chain domain protein
arahy.L4R73E	nodulin MtN21 /EamA-like transporter family protein
arahy.DB19LV	nodulin MtN21 /EamA-like transporter family protein
arahy.DEE1DG	nodulin MtN21 /EamA-like transporter family protein
arahy.0GM2Z0	nodulin MtN21 /EamA-like transporter family protein
arahy.D4BK2C	emp24/gp25L/p24 family/GOLD family protein
arahy.Z8FB5F	YbaK/aminoacyl-tRNA synthetase-associated domain
arahy.UWNN8R	phosphatidylinositol 4-phosphate 5-kinase 4-like
arahy.KF0JQ1	Pyridoxal phosphate-dependent transferases superfamily protein isoform 1
arahy.D5S9L5	protein notum homolog isoform X2
arahy.WDY3M6	DIS3-like exonuclease 2-like
