# Supplementary material for: Genetic mapping of AhVt1, a novel genetic locus that confers the variegated testa color in cultivated peanut (Arachis hypogaea L.) and its utilization for marker-assisted selection
Source: Front Plant Sci. 2023 Mar 20;14:1145098. doi: 10.3389/fpls.2023.1145098 (PMC10067746; doi:10.3389/fpls.2023.1145098)
Supplement: Supplementary file 4 [file Table_4.xlsx]

## Sheet: Sheet1
Tab. S4 Variants identified in AhVt1 mapping region
Position	Ref	Alt	Al	Ga
9461339	T	C	intergenic
9466293	C	T	intergenic
9478777	A	T	intergenic
9479032	G	T	intergenic
9485036	G	A	intergenic
9494436	G	A	intergenic
9500337	C	A	intergenic
9512984	C	T	intergenic
9522352	G	A	intergenic
9526354	ATGT	A	intergenic
9526683	G	A	intergenic
9540941	G	A	intergenic
9548210	A	T	intergenic
9551841	G	A	intergenic
9567186	A	AT	intergenic
9570051	C	G	UTR5	arahy.Y173KB
9572554	G	A	downstream	arahy.Y173KB
9573062	C	T	downstream	arahy.Y173KB
9581881	G	A	intergenic
9593253	T	C	intergenic
9616729	G	T	intronic	arahy.IZP4D2
9637847	G	C	intronic	arahy.YPS6G7
9652384	T	A	intergenic
9658274	G	A	intergenic
9661438	C	T	intergenic
9666093	G	A	intergenic
9668366	T	C	intergenic
9702325	T	C	exonic	arahy.H7N144 (nonsynonymous )
9705609	C	T	intergenic
9725016	C	T	intergenic
9727570	A	C	intergenic
9733494	C	T	intergenic
9737002	T	A	intergenic
9779160	G	A	upstream	arahy.W96YQ7
9781426	T	TAAG	intergenic
9798806	AT	A	intergenic
9801058	T	A	intergenic
9813128	G	A	intergenic
9813325	G	T	intergenic
9815904	C	T	intergenic
9819918	C	A	intergenic
9823113	C	T	intergenic
9826732	C	T	intergenic
9839120	G	A	intergenic
9883331	AT	A	intergenic
9885550	C	T	upstream	arahy.H1H5BB
10220536	C	T	intergenic
10436208	G	A	intergenic
10571227	T	G	intergenic
10586362	A	T	intergenic
10733787	C	T	intergenic
10769327	C	T	intergenic
10859199	A	AAT	intergenic
10861244	C	T	intergenic
10861782	C	T	downstream	arahy.CFE04G
10864154	A	AAT	intronic	arahy.CFE04G
10889489	C	T	intronic	arahy.I1811Q
10930488	C	T	intergenic
10944680	C	CTCT	UTR5	arahy.NY6I93
11005663	C	T	intergenic
11018632	AT	A	intergenic
11020291	C	CAT	UTR3	arahy.9F81FQ
11024163	A	G	upstream	arahy.9F81FQ
11052835	C	T	intergenic
11052899	C	T	intergenic
11053157	G	A	intergenic
11067574	G	A	intergenic
11067620	G	A	intergenic
11081903	AT	A	intergenic
11093468	T	A	intergenic
11093639	C	T	intergenic
11107037	C	G	splicing	arahy.L4R73E
11111961	C	CAA	intergenic
11112622	CA	C	intergenic
11169972	T	TA	intronic	arahy.0GM2Z0
11198968	G	T	intergenic
11200558	C	A	intergenic
11201655	C	T	intergenic
11209888	G	A	intergenic
11232005	G	A	intergenic
11241929	C	T	intergenic
11251238	C	A	exonic	arahy.UWNN8R(nonsynonymous)
11252646	T	C	UTR5	arahy.UWNN8R
11252663	G	A	UTR5	arahy.UWNN8R
11278295	C	T	intergenic
11284335	A	G	intergenic
11284676	G	A	intergenic
11289545	C	T	intergenic
11294231	C	T	intergenic
11296139	C	T	intergenic
11312332	C	T	intergenic
11316554	T	A	intergenic
11317968	C	A	intergenic
11323996	G	A	intergenic
11330436	GT	G	intergenic
11334872	G	A	intergenic
11360349	G	A	intergenic
