# Supplementary material for: Genetic mapping of AhVt1, a novel genetic locus that confers the variegated testa color in cultivated peanut (Arachis hypogaea L.) and its utilization for marker-assisted selection
Source: Front Plant Sci. 2023 Mar 20;14:1145098. doi: 10.3389/fpls.2023.1145098 (PMC10067746; doi:10.3389/fpls.2023.1145098)
Supplement: Supplementary file 5 [file Table_5.xlsx]

## Sheet: Sheet1
Tab. S5 List of DEGs in AhVt1 mapping region
Gene ID	Annotation	FPKM in pigmented region	FPKM in unpigmented region	FDR	log2FC
arahy.NKL1UU	MADS-box transcription factor family protein	2.258	59.963	7.3e-13	4.659
arahy.AG2MXP	transmembrane amino acid transporter family protein	22.623	9.142	0.00848628	-1.3
arahy.FQ5ZUR	response regulator 9	1.165	15.756	6.21e-12	3.66533
arahy.33MSFM	senescence-inducible chloroplast stay-green protein 2	0.882	4.361	0.00484893	2.17951
